1 **Validation of Utstein-Based score to predict Return Of Spontaneous Circulation (UB-ROSC)**  
2 **in patients with out-of-hospital cardiac arrest**

3  
4 Maria Luce Caputo MD, PhD<sup>1,3</sup>, Enrico Baldi MD, PhD<sup>2</sup>, Roman Burkart RN, MSc<sup>3</sup>, André  
5 Wilmes RN, MSc<sup>3</sup>, Ruggero Cresta RN, MSc<sup>4,5</sup>, Claudio Benvenuti, Mr<sup>4</sup>, Roberto Cianella, Mr<sup>5</sup>,  
6 Roberto Primi MD<sup>2</sup>, Alessia Currao MD<sup>2</sup>, Sara Bendotti MD<sup>2</sup>, Sara Compagnoni MD<sup>2,6</sup>, Francesca  
7 Romana Gentile MD<sup>2,6</sup>, Luciano Anselmi MD<sup>5</sup>, Simone Savastano MD<sup>2</sup>, Catherine Klersy MD,  
8 MScEpid<sup>7</sup>, Angelo Auricchio, MD, PhD<sup>1,3</sup>

9 *(1) Department of Cardiology, Cardiocentro Ticino Institute-EOC, Lugano, Switzerland*

10 *(2) Division of Cardiology, Fondazione IRCCS Policlinico San Matteo, Pavia, Italy.*

11 *(3) Interassociation for Rescue Services (IVR-IAS), Aarau, Switzerland*

12 *(4) Fondazione Ticino Cuore, Lugano, Switzerland*

13 *(5) Federazione Cantonale Ticinese Servizi Autoambulanze, Bellinzona, Switzerland*

14 *(6) Department of Molecular Medicine, University of Pavia, Pavia, Italy*

15 *(7) Service of Biostatistics and Clinical Trial Center, Fondazione IRCCS Policlinico San*  
16 *Matteo, Pavia, Italy*

17 Short title: UB-ROSC validation in a large cohort of OHCA

18

19 Corresponding author:

20 Maria Luce Caputo, MD, PhD

21 Email: [marialuce.caputo@eoc.ch](mailto:marialuce.caputo@eoc.ch)

22 Department of Cardiology, Cardiocentro Ticino Institute-EOC

23 Via Tesserete 48, 6900 Lugano, Switzerland

24

25 Word count: 5155

26

27  
28  
29  
30

## ABSTRACT

31 Background. Prediction of probability of return of spontaneous circulation (ROSC) during out-of-  
32 hospital cardiac arrest (OHCA) is one of the biggest challenge in resuscitation science. The Utstein  
33 Based-ROSC (UB-ROSC) score has been developed to predict ROSC in OHCA's victims. Aim of  
34 the study was to validate UB-ROSC score using two large Utstein-based OHCA registries: the  
35 SWiss REgistry of Cardiac Arrest (SWISSRECA) and the Lombardia Cardiac Arrest Registry  
36 (Lombardia CARE), northern Italy.

37 Methods. Consecutive OHCA of any etiology occurring between January 1<sup>st</sup>, 2019 and December  
38 31<sup>st</sup> and registered in 2 large national registries were included in a prospectively designed validation  
39 study. For model validation, a model area under the ROC curve (AUC ROC) for discrimination,  
40 using 10-fold cross-validation was computed. The score was plotted against the survival to hospital  
41 admission.

42 Results. 14,715 patients were included in the study. A sustained ROSC was obtained in 3,151  
43 patients (21%). Overall, UB-ROSC model showed a good discrimination (AUC 0.72, 95% CI 0.71-  
44 0.73). Shape of risk predicted by the model was almost linear and the model resulted well  
45 calibrated. In the low likelihood subgroup of UB-ROSC, only 9% of patients achieved a ROSC.  
46 This proportion raised to 35% for UB-ROSC score between -18 and 12 (OR 5.3, 95% CI 2.9-9.4,  
47 P<0.001). Finally, in 85% of patients with UB-ROSC values of more than or equal to 13 a ROSC  
48 was obtained (OR 52.1, 95%CI 15.6-173.0, P <0.001).

49 Conclusions. UB-ROSC score may represent a reliable tool to predict ROSC probability. Its  
50 application may help the decision-making process providing a realistic stratification of probability  
51 of ROSC achievement.

52 Keywords: out of hospital cardiac arrest, Utstein, return of spontaneous circulation, prediction,  
53 score

54

## 55 **Clinical perspectives**

### 56 **What is new?**

- 57 - UB-ROSC is the unique Utstein-based score designed to help EMS staff to stratify patient's
- 58 probability of ROSC before treating the patient.
- 59 - In this validation study, UB-ROSC score was verified in a cohort of more than 14,000
- 60 OHCA and confirmed a very high power in discrimination of ROSC probability
- 61 - The score is very user-friendly and may be considered a helpful tool for EMS in the
- 62 decision-making process when approaching OHCA victims.

63

### 64 **What are the clinical implications?**

- 65 - Sudden cardiac death is the leading causes of death worldwide and substantially contribute
- 66 to loss of health and excess health system costs.
- 67 - Development and validation of models to stratify probability of survival are increasingly
- 68 necessary in the decision-making process, particularly in a pre-hospital setting, to offer a
- 69 realistic expectation of survival and eventually to terminate resuscitation attempts.

70

## 71 **Introduction**

72 Out-of-hospital cardiac arrest (OHCA) is the most frequent cause of death in the  
73 industrialized countries (1,2). OHCA outcome is influenced by several independent variables  
74 related to patient's characteristics, e.g. age, comorbidity, and to circumstances of the event  
75 (etiology, witnessed or not, public or private location) (3) as well as by modifiable factors,  
76 including bystanders and intervention time of emergency medical services (EMS) (4,5). As  
77 survival, also the probability to return of spontaneous circulation (ROSC) significantly varies across  
78 geographies (3,6).

79 Prediction of sustained ROSC is an important goal in resuscitation science. Its assessment is  
80 highly valued by both medical personnel, and family members as it may allow a reasonable  
81 expectation of immediate outcome as well as to provide a guidance for termination-of-resuscitation  
82 rules beyond those currently available. Among other scores, the Utstein Based-ROSC (UB-ROSC)  
83 score was recently proposed as a multiparametric operative model developed using pre-hospital  
84 independent variables, collected according to Utstein recommendations (7). It allows to predict  
85 probability of sustained ROSC leading to hospital admission with a good sensitivity and specificity  
86 (7). The score was developed and validated in two large regional registries, the TIRECA (Ticino  
87 REgstry of Cardiac Arrest) in the Swiss Canton Ticino and the Pavia CARE (Pavia Cardiac Arrest  
88 Registry) in the Italian province of Pavia. The score can be calculated using a mobile application  
89 (<http://www.sanmatteo.org/site/home/ub-rosc-score.html>) (8-11). To date, the UB-ROSC score has  
90 not been never validated in a larger external cohort of OHCA's.

91 The aim of our study was to validate the UB-ROSC using OHCA's collected in two large  
92 Utstein-based registries in two different countries: the SWISSRECA (Swiss Registry of Cardiac  
93 Arrest) and the Lombardia CARE (Lombardia Cardiac Arrest Registry).

94

## 95 **Methods**

96 **Participants.** All consecutive patients who suffered an OHCA of any etiology between 1st of  
97 January 2019 and 31st of December of 2021 in Lombardia, northern Italy, and in Switzerland were  
98 included in the study. Patients declared dead before ambulance arrival, with a “do not resuscitate”  
99 order, with incomplete or unknown data were excluded from further analysis.

100 **Study design and setting.** This is a prospectively designed study to validate a multiparametric  
101 operative score (UB-ROSC score) capable to predict the probability of survival to hospital  
102 admission (sustained ROSC) by using consecutive OHCA cases already available in 2 large  
103 national registries. UB-ROSC score development was described elsewhere (7). Lombardia region  
104 and Switzerland both have a prospectively designed registry of cardiac arrest. Both registries follow  
105 the Utstein recommendations for data collection (12,13). The two registries are periodically  
106 reviewed for quality assessment by an internal commission, and were approved by the local ethical  
107 committee. The Lombardia CARE enrolls all the OHCA cases occurring in the Province of Pavia  
108 since January 1, 2015 and in the provinces of Pavia, Lodi, Cremona, and Mantua since January 1,  
109 2019. All the data are collected following Utstein 2014 recommendations (11). The registry was  
110 approved by the Ethical Committee of the Fondazione IRCSS Policlinico San Matteo (proc.  
111 20140028219) and by all others who were territorially involved. An informed consent form was  
112 signed by all the patients discharged alive. SWISSRECA is a national cardiac arrest registry set up  
113 by the Interassociation for Rescue Services (IVR- IAS) at the end of 2018, which collects OHCA  
114 of every etiology occurring in the whole of the Switzerland. SWISSRECA is approved by the  
115 national Ethical committee (Swissethics- ID-2016-01844) and IVR-IAS is responsible for its  
116 maintenance.

117 **EMS and resuscitation network in Lombardia Region, Northern Italy.** The total area covered  
118 by the Lombardia CARE registry was 7,863 km<sup>2</sup> in 2019 and increased to 15,125 km<sup>2</sup> in 2021.  
119 Details of registry development and corresponding changes over time in provinces included in the  
120 registry are reported in table 1 of supplemental materials. Each province has several rural regions

121 and a few urban areas for a total population covered of 1,547,333 inhabitants in 2019, increased to  
122 4,274,296 inhabitants in 2021.

123 The EMS dispatch center coordinates ambulances staffed with basic life support and defibrillation  
124 (BLS-D)-trained personnel, and advanced life support (ALS)- trained staffed vehicles (a physician  
125 and a specialized nurse or a specialized nurse only). The specialized nurse, if alone in the ALS-  
126 staffed vehicle, applies the same ALS protocol, using supraglottic devices instead of tracheal  
127 intubation. Five helicopters with a physician and a specialized nurse on board also serve the entire  
128 region of Lombardy and another three can intervene from other neighboring regions. In the case of  
129 suspected OHCA, the EMS dispatcher activates one to three emergency vehicles (which may  
130 include a helicopter) with at least one physician and assists the calling bystander during chest  
131 compressions (telephone CPR). The decisions about the attempt and the duration of resuscitation  
132 are left to the physician whilst BLS-D-trained personnel are instructed to start resuscitation unless  
133 clear signs of death are present (rigor mortis, hypostasis, and injuries not compatible with life).

134 **EMS and resuscitation network in Switzerland.** In Switzerland (8.57-million inhabitants over a  
135 territory of 41,285 Km<sup>2</sup>, divided in 26 Cantons), OHCAs are managed by local EMS with a two-  
136 tiered response system, coordinated via a regional (cantonal) dispatch center. The first tier consists  
137 of paramedics who can provide advanced life support, the second tier is made up of teams  
138 (ambulance or helicopter) with an emergency physician, alerted if required. Paramedics are  
139 instructed to initiate resuscitation unless clear signs of death are present or in case of a Do Not  
140 Attempt Resuscitation order. The decision to stop resuscitation and the death declaration are based  
141 on the physician's clinical judgment. The Swiss territory encompasses several rural areas  
142 (mountains and valleys) and few relatively small urban areas. In all cantons, there is a network of  
143 first responders (FR), made up of off-duty EMS personnel, fire-fighters, police and laypeople  
144 trained in CPR, who are alerted via a mobile application and can provide basic life support and use  
145 an automatic external defibrillator (AED).

146 **UB-ROSC score variables and outcome of the model.** UB-ROSC score model development was  
147 described before (7). Briefly, variables that may be determinants of survival at hospital admission  
148 were identified among Utstein variables immediately available at EMS arrival on the scene. Age,  
149 sex, aetiology, location, witnessed OHCA, bystander CPR, time of EMS arrival and shockable  
150 rhythm were included in the model (7). The coefficients estimated from the model, multiplied by  
151 10 and rounded to the closest integer were used to compute a prediction score. All variables  
152 included in the model and corresponding scores for UB-ROSC calculation were reported in table 1.  
153 Survival to hospital admission was defined as patient with ROSC sustained until arrival at the  
154 emergency department and transfer of care to medical staff at the receiving hospital. This definition  
155 corresponds to the Utstein recommendations' core outcome of "Survived event" (13). Probability of  
156 survival at hospital admission corresponding to different values of UB-ROSC score were reported  
157 in table 2 of Supplemental Material.

158 **Statistical analysis.** All analyses were performed using the Stata software (release 17, College  
159 Station, TX, USA). A 2-sided  $p < 0.05$  was considered statistically significant. Continuous data are  
160 reported as mean and standard deviation or median and quartiles if skewed. Categorical data are  
161 reported as counts and percent. Data were compared between groups of patients (by national  
162 territory and by ROSC groups) with the Mann Whitney U test and the Fisher exact test,  
163 respectively. The UB-ROSC score was computed for each patient according to the original paper  
164 (7) and categorized in the 3 subgroups of low, medium and high likelihood of ROSC according to  
165 the published cut-offs of UB-ROSC. ( $\leq -19$ ;  $-18$  to  $12$ ;  $\geq 13$ ). The latter variable was included in a  
166 logistic model for ROSC as the independent variable; Huber-White robust standard errors were  
167 computed to account for intra-region correlation. We derived the odds ratios (OR) and 95%  
168 confidence intervals (95%CI). To assess the performance of the UB-ROSC score in this new cohort,  
169 we assessed both discrimination and calibration. For discrimination we computed the cross-validated  
170 model area under the Receiver Operating Characteristic-ROC curve and 95%CI. Sensitivity and

171 specificity of the model were also computed. For this purpose, patients were classified as ROSC if  
172 the predicted probability was equal to or above 0.5. To assess calibration, we plotted the observed  
173 and predicted probabilities of ROSC as a calibration belt. Model goodness of fit was assessed with  
174 the Pearson test and was always satisfied.

## 175 **Results**

176 Overall, 22,794 OHCA cases were included in the two registries. 8,079 (35%) were  
177 declared dead before ambulance arrival or had a “do not resuscitate” order, leaving 14,715 patients  
178 for further analysis. Demographic and clinical characteristics of OHCAs included in the two  
179 national registries are reported in table 2. Swiss patients were in median 8-year younger than Italian  
180 ones (70 years old, IQR 58-80 versus 78 years old, IQR 66-86, respectively,  $P<0.001$ , table 2).  
181 Moreover, Swiss OHCAs occurred more often in public location (37% versus 17%,  $p<0.001$ , table  
182 2) and had a first shockable rhythm (31% versus 14%,  $p<0.001$ ).

183 **Observed ROSC and UB-ROSC validation.** A ROSC was obtained in 3,151 patients (21%). The  
184 overall observed ROSC rate was higher in SWISSRECA than in Lombardia CARE (31% versus  
185 15%,  $p<0.001$ , table 2). UB-ROSC model had a similar discrimination power with an area under the  
186 ROC curve (AUC) of 0.68 in SWISSRECA and of 0.73 in Lombardia CARE (figure 1). Model  
187 validation and calibration in the entire population is reported in figure 2. Overall, UB-ROSC model  
188 showed a good discrimination (AUC 0.72, 95% CI 0.71-0.73, figure 2, panel A). Model had 10%  
189 sensitivity and 99% specificity to predict ROSC, with a positive predictive value of 85% and a  
190 negative predictive value of 80%. Events correctly classified by the model were 80%. The shape of  
191 risk predicted by the model was almost linear and the model was very well calibrated, with a 10-  
192 fold cross validation AUC of ROC of 0.71, 95%CI 0.70-0.72,  $P=1.0$ . Curve of the shape of risk and  
193 internal calibration test is presented in figure 2, panel B and C. The probability to obtain ROSC,  
194 according to the 3 subgroups and corresponding ORs are reported in table 3 and Figure 3. For UB-  
195 ROSC score values of less than or equal to -19, only in 9% of patients a ROSC was achieved,  
196 increasing to 35% for UB-ROSC score between -18 and 12 (OR 5.3, 95% CI 2.9-9.4,  $P<0.001$ ). In



197 85% of patients with UB-ROSC values of more than or equal to 13 a ROSC was obtained (OR 52.1,  
198 95%CI 15.6-173.0, P <0.001). Characteristics of OHCA presentation according to UB-ROSC score  
199 subgroups are reported in table 3. Patients with the lowest UB-ROSC values ( $\leq$ 19) were  
200 significantly older (median age 80 years old, IQR 68-87), 52% unwitnessed, 83% occurred in  
201 private location and 99% of them had a no-shockable rhythm. In contrast, patients in the high  
202 likelihood subgroup of UB-ROSC (UB-ROSC score  $\geq$  13) were younger (median age 62 years old,  
203 IQR 53-71), 58% occurred in public location, and 99% of them were witnessed and with a first  
204 shockable rhythm, respectively.

205

## 206 **Discussion**

207 UB-ROSC is an operational score for prediction of ROSC probability after an OHCA. It is  
208 designed to use Utstein variables and categories thus, allowing a very easy calculation of the score  
209 and of the corresponding probability of ROSC. For the first time, we showed in a large OHCA  
210 cohort that the UB-ROSC score had excellent discrimination capability and can be used in-field to  
211 possibly support resuscitation-related decisions such as considering termination of resuscitation  
212 manoeuvres, and to set realistic expectations about the likelihood of achieving sustained ROSC  
213 during resuscitation manoeuvres. This knowledge is important for paramedics, rescue teams and  
214 even more so for family members.

215 Similarly, ACLS score has been proposed as operative score (14) helping to stratify the  
216 probability of survival during ongoing resuscitation. The two models shared similarities in variables  
217 included but the performance of the two scores is not comparable, because ACLS score's outcome  
218 was survival at discharge from hospital while UB-ROSC model predicts persistent ROSC (survival  
219 at hospital admission). Among various models that predict the likelihood of gaining ROSC, the  
220 ROSC after Cardiac Arrest (RACA) score developed with the German Resuscitation Registry (15)  
221 is one of the most validated in external populations. However, differently from UB-ROSC, the

222 RACA score was not designed to be used as a prediction tool on the spot to facilitate resuscitation  
223 decisions. Instead, by providing a predicted ROSC rate, the score enables comparison of studies  
224 conducted in different communities and cohorts, serving as a 'quality indicator' of different EMS  
225 systems. External validation of RACA score yielded mixed results. (16-20) The discrepancies,  
226 although partially explained by different resuscitation practices over time, often imply the need for  
227 further adjustment of the score for individual communities. (18)

228 By using Utstein based variables, UB-ROSC score overcomes two major limitations of  
229 RACA score: first, the need to re-classify variables included in Utstein registries before calculate  
230 the score, and, then the potential bias of overestimation of ROSC by including also patients with  
231 transient ROSC. Moreover, when validated in an external population (17) the RACA score had a  
232 suboptimal calibration at the two extremes, i.e. in patients with the lowest or highest probability of  
233 ROSC. In contrast, UB-ROSC score confirmed a good discrimination power, with an AUC of ROC  
234 curve of 0.72, confirmed at 10-fold cross validation, and with an excellent calibration of the model  
235 even at the two extremes.

236 Swiss and Italian OHCA populations were significantly different in characteristics of  
237 presentation and in some aspects of the out-of-hospital management. As compared with Italian  
238 patients, Swiss patients were younger, more often had an OHCA in a public place and up to 50% of  
239 them received a CPR before ambulance arrival. However, even accounting for significant  
240 differences in the two enrolled population, UB-ROSC score confirmed a good power in prediction  
241 of ROSC probability with an excellent calibration of the model in both the two populations.

242 The increasing call for survival prediction models, eventually by including surrogates of  
243 quality of CPR, as End-tidal CO<sub>2</sub> (21), or artificial intelligence software (22), derives from the  
244 emerging need to optimize available resources for pre-hospital and in-hospital management of these  
245 patients. OHCA is a clinical event with huge repercussions on community in terms of costs,

246 healthcare personnel utilization and psychological impact. Resuscitation prolongation and  
247 transportation to hospital of patients who have little possibility of survival has several negative  
248 consequences in terms of public health costs and noteworthy it represents an additional distress for  
249 family members. Starting from this consideration, several algorithms and rules have been proposed  
250 to help identifying those people with low chance of survival at discharge, in whom it could be  
251 reasonable to terminate resuscitation before hospital admission. UB-ROSC score cut-offs were very  
252 accurate in identification of patients with low probability of survival. Only 9% of patients in the  
253 lowest subgroup of UB ROSC score ( $\leq -19$ ) achieved a ROSC and, looking at their characteristics,  
254 they are almost all patients with no shockable rhythm, unwitnessed, and without CPR before  
255 ambulance arrival. Same characteristics have been included in different termination-of-resuscitation  
256 rules protocols. Accuracy of these protocols in predicting in-hospital mortality was assessed in large  
257 registries in Western countries and in Pan-Asian Resuscitation Outcomes Study (PAROS) registry.  
258 (23, 24) They identified a large proportion of patients who are candidates for termination of  
259 resuscitation following OHCA with very low rate of misclassifying eventual survivors (<0.1%).  
260 Even if patients fitting these rules had same characteristics of those with a low UB-ROSC score  
261 (unwitnessed OHCA, no shockable rhythm and no CPR initiated by bystander), evaluated outcome  
262 is substantially different. In a pre-hospital setting and when considering only pre-hospital variables,  
263 is probably more reasonable to evaluate ROSC probability instead of survival at discharge, being  
264 the latter affected also by in-hospital treatment. The same observation may apply also to ACLS  
265 score application, which evaluated survival at discharge. With this purpose, UB-ROSC score was  
266 designed to be calculated even before EMS team arrival on scene, in order to provide an estimation  
267 of ROSC likelihood before approaching the patient.

268 Tools like UB-ROSC may be useful also to individuate people with the theoretically highest  
269 chance of survival. Patients in the of UB-ROSC subgroup with highest likelihood of ROSC have a  
270 very favourable OHCA presentation (shockable rhythm, public place, bystander or EMS witnessed).

271 Fast recognition of these patients may help to organize all available resources, eventually including  
272 early in-hospital hemodynamical support, and to personalize the resuscitation approach by taking in  
273 to account the real probability of survival.

274 Comparison between predicted and observed ROSC represents a unique opportunity for  
275 EMS staff to re-analyse and debrief most difficult cases. With this purpose, UB-ROSC is currently  
276 automatically calculated for each OHCA enrolled in SWISSRECA. This help a retrospective quality  
277 reassessment of those cases in which, despite a high UB-ROSC score, ROSC was not achieved.

## 278 **Limitations**

279 This study has some limitations. First, the validation cohort is an European population and  
280 the two regions shared similarities in geographical context and in EMS organization. Moreover, the  
281 two population of the original validation cohort of UB-ROSC score are included in this validation  
282 cohort. Further studies are needed to assess UB-ROSC application in different geographical areas  
283 and with substantial differences in EMS organization (i.e. Asian countries). Last, UB-ROSC score  
284 is calculated using Utstein variables and categories. Potential application of the score in non-Utstein  
285 registries requires adjustment of variables and may determine unpredictable differences in the  
286 performance of the model that needs further assessment.

## 287 **Conclusions**

288 UB-ROSC score is a valuable tool to predict ROSC probability after OHCA. Its validation  
289 in a large cohort of patients confirmed the good calibration of the model. Application of the score in  
290 a pre-hospital setting may help the decision-making process by providing a realistic stratification of  
291 probability of ROSC achievement.

## 292 **Acknowledgments**

293 We thank all the investigators of the Lombardia CARE and SWISSRECA Registry, the EMS  
294 personnel and all the people involved in the resuscitation network in our countries. EB and SS are  
295 part of the European Resuscitation Council (ERC)-Research NET. Lombardia CARE is partner of  
296 the ESCAPE-NET consortium. MLC, EB, FRG, SS and AA are part of the COST action PARQ.

297 The Lombardia CARE is a research project of the Fondazione IRCCS Policlinico San Matteo  
298 and partially supported by Fondazione Banca del Monte di Lombardia.

### 299 **Sources of Funding**

### 300 **Disclosures**

301 Authors have no conflict of interest to declare.

302

### 303 **References**

- 304 1. Nishiyama C, Kiguchi T, Okubo M, Alihodžić H, Al-Araji R, Baldi E, Beganton F,  
305 Booth S, Bray J, Christensen E, et al. Three-year trends in out-of-hospital cardiac arrest  
306 across the world: Second report from the International Liaison Committee on  
307 Resuscitation (ILCOR). *Resuscitation*. 2023;186:109757
- 308 2. Gräsner JT, Wnent J, Herlitz J, Perkins GD, Lefering R, Tjelmeland I, Koster RW,  
309 Masterson S, Rossell-Ortiz F, Maurer H, et al. Survival after out-of-hospital cardiac  
310 arrest in Europe - Results of the EuReCa TWO study. *Resuscitation*. 2020 Mar  
311 1;148:218-226
- 312 3. Hayakawa K, Tasaki O, Hamasaki T, Sakai T, Shiozaki T, Nakagawa Y, Ogura H,  
313 Kuwagata Y, Kajino K, Iwami T, et al. Prognostic indicators and outcome prediction  
314 model for patients with return of spontaneous circulation from cardiopulmonary arrest:  
315 the Utstein Osaka Project. *Resuscitation*. 2011;82:874-80.

- 316 4. Valenzuela TD, Roe DJ, Cretin S, Spaite DW, Larsen MP. Estimating effectiveness of  
317 cardiac arrest interventions: a logistic regression survival model. *Circulation* 1997; 96:  
318 3308-13.
- 319 5. Mauri R, Burkart R, Benvenuti C, Caputo ML, Moccetti T, Del Bufalo A, Gallino A,  
320 Casso C, Anselmi L, Cassina T, et al. Better management of out-of-hospital cardiac  
321 arrest increases survival rate and improves neurological outcome in the Swiss Canton  
322 Ticino. *Europace*. 2016;18: 398-404.
- 323 6. Berdowski J, Berg RA, Tijssen JG, Koster RW. Global incidences of out-of-hospital  
324 cardiac arrest and survival rates: Systematic review of 67 prospective studies.  
325 *Resuscitation*. 2010; 81:1479-87.
- 326 7. Baldi E, Caputo ML, Savastano S, Burkart R, Klersy C, Benvenuti C, Sgromo V, Palo  
327 A, Cianella R, Cacciatore E, et al. An Utstein-based model score to predict survival to  
328 hospital admission: The UB-ROSC score. *Int J Cardiol*. 2020;308: 84-89.
- 329 8. Morrison LJ, Visentin LM, Kiss A, Theriault R, Eby D, Vermeulen M, Sherbino J,  
330 Verbeek PR; TOR Investigators. Validation of a rule for termination of resuscitation in  
331 out-of-hospital cardiac arrest. *N Engl J Med*. 2006;355:478-87.
- 332 9. Goto Y, Maeda T, Goto YN. Termination-of-resuscitation rule for emergency  
333 department physicians treating out-of-hospital cardiac arrest patients: an observational  
334 cohort study. *Crit Care*. 2013; 17: R235.
- 335 10. Shibahashi K, Sugiyama K, Hamabe Y. A potential termination of resuscitation rule for  
336 EMS to implement in the field for out-of-hospital cardiac arrest: An observational cohort  
337 study. *Resuscitation*. 2018; 130: 28-32.
- 338 11. Bossaert LL, Perkins GD, Askitopoulou H, Raffay VI, Greif R, Haywood KL,  
339 Mentzelopoulos SD, Nolan JP, Van de Voorde P, Xanthos TT; ethics of resuscitation  
340 and end-of-life decisions section Collaborators. European Resuscitation Council

341 Guidelines for Resuscitation 2015: Section 11. The ethics of resuscitation and end-of-life  
342 decisions. *Resuscitation*. 2015; 95:302-11.

343 12. Jacobs I, Nadkarni V, Bahr J, Berg RA, Billi JE, Bossaert L, Cassan P, Coovadia A,  
344 D'Este K, Finn J, et al; International Liaison Committee on Resuscitation; American  
345 Heart Association; European Resuscitation Council; Australian Resuscitation Council;  
346 New Zealand Resuscitation Council; Heart and Stroke Foundation of Canada;  
347 InterAmerican Heart Foundation; Resuscitation Councils of Southern Africa; ILCOR  
348 Task Force on Cardiac Arrest and Cardiopulmonary Resuscitation Outcomes. Cardiac  
349 arrest and cardiopulmonary resuscitation outcome reports: update and simplification of  
350 the Utstein templates for resuscitation registries: a statement for healthcare professionals  
351 from a task force of the International Liaison Committee on Resuscitation (American  
352 Heart Association, European Resuscitation Council, Australian Resuscitation Council,  
353 New Zealand Resuscitation Council, Heart and Stroke Foundation of Canada,  
354 InterAmerican Heart Foundation, Resuscitation Councils of Southern Africa).  
355 *Circulation*. 2004;110: 3385-97.

356 13. Perkins GD, Jacobs IG, Nadkarni VM, Berg RA, Bhanji F, Biarent D, Bossaert LL, Brett  
357 SJ, Chamberlain D, de Caen AR, et al; Utstein Collaborators. Cardiac arrest and  
358 cardiopulmonary resuscitation outcome reports: update of the Utstein Resuscitation  
359 Registry Templates for Out-of-Hospital Cardiac Arrest: a statement for healthcare  
360 professionals from a task force of the International Liaison Committee on Resuscitation  
361 (American Heart Association, European Resuscitation Council, Australian and New  
362 Zealand Council on Resuscitation, Heart and Stroke Foundation of Canada,  
363 InterAmerican Heart Foundation, Resuscitation Council of Southern Africa,  
364 Resuscitation Council of Asia); and the American Heart Association Emergency  
365 Cardiovascular Care Committee and the Council on Cardiopulmonary, Critical Care,  
366 Perioperative and Resuscitation. *Circulation*. 2015;132:1286-300.

- 367 14. Eisenberg M, Hallstrom A, Bergner L. The ACLS score. Predicting survival from out-  
368 of-hospital cardiac arrest. *JAMA*. 1981; 246: 50-2.
- 369 15. Gräsner JT, Meybohm P, Lefering R, Wnent J, Bahr J, Messelken M, Jantzen T, Franz  
370 R, Scholz J, Schleppers A, et al; German Resuscitation Registry Study Group. ROSC  
371 after cardiac arrest--the RACA score to predict outcome after out-of-hospital cardiac  
372 arrest. *Eur Heart J*. 2011;32: 1649-56.
- 373 16. Kupari P, Skrifvars M, Kuisma M. External validation of the ROSC after cardiac arrest  
374 (RACA) score in a physician staffed emergency medical service system. *Scand J*  
375 *Trauma Resusc Emerg Med*. 2017;25:34.
- 376 17. Caputo ML, Baldi E, Savastano S, Burkart R, Benvenuti C, Klersy C, Cianella R,  
377 Anselmi L, Moccetti T, Mauri R, De Ferrari GM, Auricchio A. Validation of the return  
378 of spontaneous circulation after cardiac arrest (RACA) score in two different national  
379 territories. *Resuscitation*. 2019 ;134:62-68
- 380 18. Liu N, Ong MEH, Ho AFW, Pek PP, Lu TC, Khruengkarnchana P, Song KJ, Tanaka H,  
381 Naroo GY, Gan HN, Koh ZX, Ma MH; PAROS Clinical Research Network. Validation  
382 of the ROSC after cardiac arrest (RACA) score in Pan-Asian out-of-hospital cardiac  
383 arrest patients. *Resuscitation*. 2020;149: 53-59.
- 384 19. Neukamm J, Gräsner JT, Schewe JC, Breil M, Bahr J, Heister U, Wnent J, Bohn A,  
385 Heller G, Strickmann B, et al. The impact of response time reliability on CPR incidence  
386 and resuscitation success: a benchmark study from the German Resuscitation Registry.  
387 *Crit Care*. 2011;15(6):R282.
- 388 20. Schewe JC, Kappler J, Heister U, Weber SU, Diepenseifen CJ, Frings B, Hoeft A,  
389 Fischer M. Outcome of out-of-hospital cardiac arrest over a period of 15 years in  
390 comparison to the RACA score in a physician staffed urban emergency medical service  
391 in Germany. *Resuscitation*. 2015;96: 232-8.



- 392 21. Baldi E, Caputo ML, Klersy C, Benvenuti C, Contri E, Palo A, Primi R, Cresta R,  
393 Compagnoni S, Cianella R, et al. End-tidal carbon dioxide (ETCO<sub>2</sub>) at intubation and its  
394 increase after 10 minutes resuscitation predicts survival with good neurological outcome  
395 in out-of-hospital cardiac arrest patients. *Resuscitation*. 2022;181: 197-207.
- 396 22. Liu N, Liu M, Chen X, Ning Y, Lee JW, Siddiqui FJ, Saffari SE, Ho AFW, Shin SD, Ma  
397 MH, et al; PAROS Clinical Research Network Investigators. Development and  
398 validation of an interpretable prehospital return of spontaneous circulation (P-ROSC)  
399 score for patients with out-of-hospital cardiac arrest using machine learning: A  
400 retrospective study. *EClinicalMedicine*. 2022; 48:101422.
- 401 23. Ebell MH, Vellinga A, Masterson S, Yun P. Meta-analysis of the accuracy of  
402 termination of resuscitation rules for out-of-hospital cardiac arrest. *Emerg Med J*.  
403 2019;36: 479-484.
- 404 24. Hsu SH, Sun JT, Huang EP, Nishiuchi T, Song KJ, Leong B, Rahman NHNA,  
405 Khruengkarnchana P, Naroo GY, Hsieh MJ, et al. The predictive performance of current  
406 termination-of-resuscitation rules in patients following out-of-hospital cardiac arrest in  
407 Asian countries: A cross-sectional multicentre study. *PLoS One*. 2022;17: e0270986.

#### 408 **Tables and figures legend**

409 **Table 1.** Variables and corresponding scores for UB-ROSC calculation. Witness status and  
410 cardiopulmonary resuscitation (CPR) before ambulance arrival were combined as follows: no  
411 wit/no CPR: bystander witnessed: no, CPR before ambulance arrival: no; no wit/yes CPR:  
412 bystander witnessed: no, CPR before ambulance arrival: yes; yes wit/no CPR: bystander witnessed:  
413 yes, CPR before ambulance arrival: no; yes wit/no CPR: bystander witnessed: yes, CPR before  
414 ambulance arrival: yes; EMS: emergency medical service.

415 **Table 2.** Comparison between out-of-hospital cardiac arrest presentation and outcome in the two  
416 registries. Witness status and cardiopulmonary resuscitation (CPR) before ambulance arrival were

417 combined as follows: no wit/no CPR: bystander witnessed: no, CPR before ambulance arrival: no;  
418 no wit/yes CPR: bystander witnessed: no, CPR before ambulance arrival: yes; yes wit/no CPR:  
419 bystander witnessed: yes, CPR before ambulance arrival: no; yes wit/no CPR: bystander witnessed:  
420 yes, CPR before ambulance arrival: yes; EMS: emergency medical service. ROSC: return of  
421 spontaneous circulation.

422 **Table 3.** OHCA presentation characteristics according to UB-ROSC score likelihood groups. For  
423 categorical variables, Post-hoc comparisons p for significance was 0.017. \* Significant p value  
424 between low and intermediate groups; <sup>§</sup> significant p value between intermediate and high groups; <sup>£</sup>  
425 significant p value between high and low groups. For continuous variables, p-value resulting from  
426 one-way analysis of variance by ranks (Kruskall-Wallis test) was reported. Witness status and  
427 cardiopulmonary resuscitation (CPR) before ambulance arrival were combined as follows: no  
428 wit/no CPR: bystander witnessed: no, CPR before ambulance arrival: no; no wit/yes CPR:  
429 bystander witnessed: no, CPR before ambulance arrival: yes; yes wit/no CPR: bystander witnessed:  
430 yes, CPR before ambulance arrival: no; yes wit/no CPR: bystander witnessed: yes, CPR before  
431 ambulance arrival: yes; EMS: emergency medical service. ROSC: return of spontaneous circulation.

432 **Table 1\_Supplemental material.** Provinces progressively included in Lombardia CARE registry  
433 since 2019.

434 **Table 2\_Supplemental material.** Probabilities of survival at hospital admission with 95% CI and  
435 corresponding values of UB-ROSC score. (7)

436 **Figure 1.** Receiver Operating Characteristic (ROC) curve of UB-ROSC score in Lombardia CARE  
437 (panel A) and in SWISSRECA population (panel B).

438 **Figure 2.** UB-ROSC model discrimination, shape of risk and calibration. **Panel A:** Receiver  
439 Operating Characteristic (ROC) curve of UB-ROSC score; **Panel B:** Shape of risk of the model.  
440 **Panel C:** Calibration curve of the model. The bisecting line corresponds to perfect calibration of  
441 the model (perfect agreement between observed ROSC and predicted ROSC. The line is entirely  
442 included in the shaded area corresponding to the 80% and 95% confidence intervals for the

443 observed-predicted relationship, denoting that the model is well calibrated (there is neither over nor  
444 underestimation of mortality).

445 **Figure 3.** Cut-offs of UB-ROSC score and corresponding probability of ROSC.

446

447

448

Table 1. Variables and corresponding scores for UB-ROSC calculation.

| <b>UB-ROSC variables</b>   | <b>SCORE COMPONENT</b> |
|----------------------------|------------------------|
| <b>Sex</b>                 |                        |
| Female                     | 0                      |
| Male                       | -3                     |
| <b>Age</b>                 |                        |
| <80                        | 0                      |
| ≥80                        | -9                     |
| <b>Aetiology</b>           |                        |
| Cardiac                    | 0                      |
| Trauma                     | -3                     |
| Drowning                   | 1                      |
| Respiratory                | 19                     |
| Other non-cardiac          | 0                      |
| <b>Location</b>            |                        |
| At home                    | 0                      |
| Nursing home               | -7                     |
| Workplace                  | 6                      |
| School                     | 0                      |
| Street                     | 4                      |
| Public building            | 5                      |
| Sport                      | 7                      |
| <b>Bystander and CPR</b>   |                        |
| No witnessed, no CPR       | 0                      |
| No witnessed, yes CPR      | -5                     |
| Witnessed, no CPR          | 2                      |
| Witnessed, yes CPR         | 4                      |
| EMS witnessed              | 13                     |
| <b>Rhythm</b>              |                        |
| Not shockable              | 0                      |
| Shockable                  | 21                     |
| <b>Time to EMS arrival</b> |                        |
| ≤ 10 min                   | 0                      |
| 11-15 min                  | -4                     |
| ≥15 min                    | -7                     |
| <b>Constant</b>            | <b>-16</b>             |

Witness status and cardiopulmonary resuscitation (CPR) before ambulance arrival were combined as follows: no wit/no CPR: bystander witnessed: no, CPR before ambulance arrival: no; no wit/yes CPR: bystander witnessed: no, CPR before ambulance arrival: yes; yes wit/no CPR: bystander witnessed: yes, CPR before ambulance arrival: no; yes wit/no CPR: bystander witnessed: yes, CPR before ambulance arrival: yes; EMS: emergency medical service.

**Table 2.** Comparison between out-of-hospital cardiac arrest presentation and outcome in the two registries.

|                                                       | <b>Lombardia Care<br/>N=7663</b> | <b>SWISSRECA<br/>N=7052</b> | <b>P value</b> |
|-------------------------------------------------------|----------------------------------|-----------------------------|----------------|
| <b>Sex, n (%)</b>                                     |                                  |                             | <0.001         |
| Female                                                | 3071 (40)                        | 2050 (29)                   |                |
| Male                                                  | 4544 (60)                        | 5002 (71)                   |                |
| <b>Age, median (IQR)</b>                              | 78 (66-86)                       | 70 (58-80)                  | <0.001         |
| <b>Medical etiology, n (%)</b>                        |                                  |                             | 0.807          |
| Yes                                                   | 7094 (92)                        | 6305 (89)                   |                |
| No                                                    | 564 (8)                          | 747 (11)                    |                |
| <b>Location, n (%)</b>                                |                                  |                             |                |
| Public                                                | 1328 (17)                        | 2629 (37)                   | <0.001         |
| Private                                               | 6335 (83)                        | 4423 (63)                   |                |
| <b>Shockable rhythm, n (%)</b>                        |                                  |                             | <0.001         |
| Yes                                                   | 1051 (14)                        | 2201 (31)                   |                |
| No                                                    | 6510 (86)                        | 4851 (69)                   |                |
| <b>Combined Witness/CPR before EMS arrival, n (%)</b> |                                  |                             | <0.001         |
| No wit/no CPR                                         | 1862 (25)                        | 709 (10)                    |                |
| No wit/yes CPR                                        | 860 (11)                         | 1674 (24)                   |                |
| Yes wit/no CPR                                        | 1766 (24)                        | 1002 (14)                   |                |
| Yes wit/ yes CPR                                      | 2073 (28)                        | 2668 (38)                   |                |
| EMS witnessed                                         | 906 (12)                         | 999 (14)                    |                |
| <b>Time to EMS arrival, min, median (IQR)</b>         | 13 (10-16)                       | 10 (8-13)                   | <0.001         |
| <b>Total resuscitation time, min, median (IQR)</b>    | 26 (16-40)                       | 23 (15-33)                  | <0.001         |
| <b>ROSC, n (%)</b>                                    | 1090 (15)                        | 2061 (31)                   | <0.001         |

Witness status and cardiopulmonary resuscitation (CPR) before ambulance arrival were combined as follows: no wit/no CPR: bystander witnessed: no, CPR before ambulance arrival: no; no wit/yes CPR: bystander witnessed: no, CPR before ambulance arrival: yes; yes wit/no CPR: bystander witnessed: yes, CPR before ambulance arrival: no; yes wit/no CPR: bystander witnessed: yes, CPR before ambulance arrival: yes; EMS: emergency medical service. ROSC: return of spontaneous circulation.



**Table 3.** OHCA presentation characteristics according to UB-ROSC score likelihood groups. For categorical variables, Post-hoc comparisons p for significance was 0.017. \* Significant p value between low and intermediate groups; § significant p value between intermediate and high groups; £ significant p value between high and low groups. For continuous variables, p-value resulting from one-way analysis of variance by ranks (Kruskall-Wallis test) was reported.

|                                            | <b>Low likelihood<br/>≤ -19</b> | <b>Intermediate likelihood<br/>-18 to 12</b> | <b>High likelihood<br/>≥ 13</b> | <b>P value between groups</b> |
|--------------------------------------------|---------------------------------|----------------------------------------------|---------------------------------|-------------------------------|
| <b>Sex, n (%)</b>                          |                                 |                                              |                                 |                               |
|                                            | *                               |                                              |                                 |                               |
| Female                                     | 2669 (36)                       | 2046 (33)                                    | 120 (34)                        |                               |
| Male                                       | 4699 (64)                       | 4123 (67)                                    | 237 (66)                        |                               |
|                                            |                                 |                                              |                                 |                               |
| <b>Age, median (IQR)</b>                   | 80 (68-87)                      | 68 (57-77)                                   | 62 (53-71)                      | <0.001                        |
| <b>Medical etiology, n (%)</b>             |                                 |                                              |                                 |                               |
|                                            | *                               |                                              | £                               |                               |
| Yes                                        | 6907 (94)                       | 5417 (88)                                    | 332 (93)                        |                               |
| No                                         | 461 (6)                         | 752 (12)                                     | 25 (7)                          |                               |
| <b>Location, n (%)</b>                     |                                 |                                              |                                 |                               |
|                                            | *                               | §                                            | £                               |                               |
| Public                                     | 1251 (17)                       | 2276 (37)                                    | 209 (58)                        |                               |
| Private                                    | 6117 (83)                       | 3893 (63)                                    | 148 (42)                        |                               |
| <b>Shockable rhythm, n (%)</b>             |                                 |                                              |                                 |                               |
|                                            | *                               | §                                            | £                               |                               |
| Yes                                        | 5 (1)                           | 2797 (45)                                    | 354 (99)                        |                               |
| No                                         | 7363 (99)                       | 3372(55)                                     | 3 (1)                           |                               |
| <b>Combined Witness/CPR, n (%)</b>         |                                 |                                              |                                 |                               |
|                                            | *                               | §                                            | £                               |                               |
| No wit/no CPR                              | 1967 (27)                       | 461 (8)                                      | 0                               |                               |
| No wit/yes CPR                             | 1847 (25)                       | 582 (9)                                      | 3 (1)                           |                               |
| Yes wit/no CPR                             | 1585 (21)                       | 1072 (17)                                    | 2 (1)                           |                               |
| Yes wit/ yes CPR                           | 1685 (23)                       | 2771 (45)                                    | 99 (27)                         |                               |
| EMS witnessed                              | 284 (4)                         | 1283 (21)                                    | 253 (71)                        |                               |
| <b>EMS arrival time, min (IQR)</b>         | 13 (10-17)                      | 10 (8-13)                                    | 9 (7-10)                        | <0.001                        |
| <b>Total resuscitation time, min (IQR)</b> | 23 (15-33)                      | 27 (16-41)                                   | 21 (12-34)                      | <0.001                        |
| <b>ROSC, n (%)</b>                         | 697 (9)*                        | 2071 (36) <sup>§</sup>                       | 273 (85) <sup>£</sup>           | <0.001                        |

Witness status and cardiopulmonary resuscitation (CPR) before ambulance arrival were combined as follows: no wit/no CPR: bystander witnessed: no, CPR before ambulance arrival: no; no wit/yes CPR: bystander witnessed: no, CPR before ambulance arrival: yes; yes wit/no CPR: bystander witnessed: yes, CPR before ambulance arrival: no; yes wit/yes CPR: bystander witnessed: yes, CPR before ambulance arrival: yes.



before ambulance arrival: yes; EMS: emergency medical service. ROSC: return of spontaneous circulation.

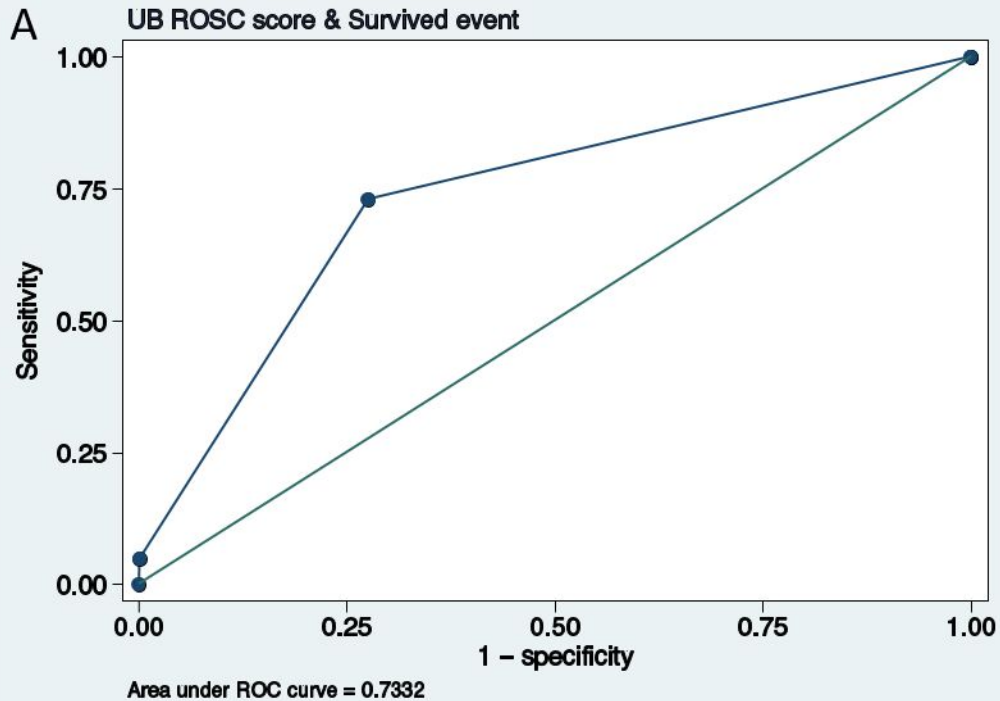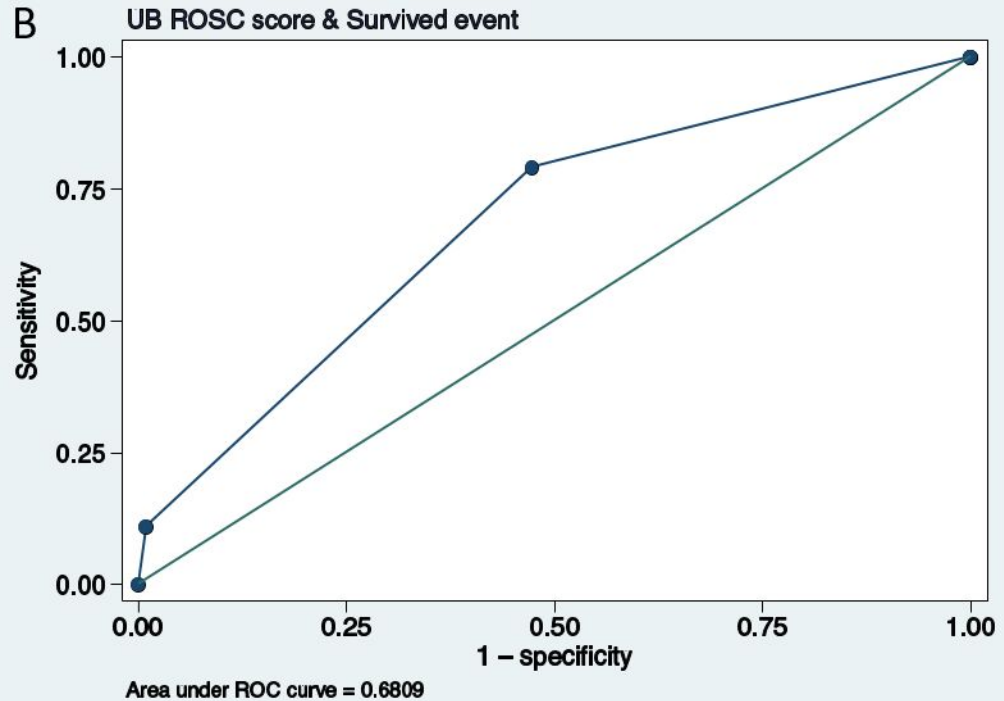

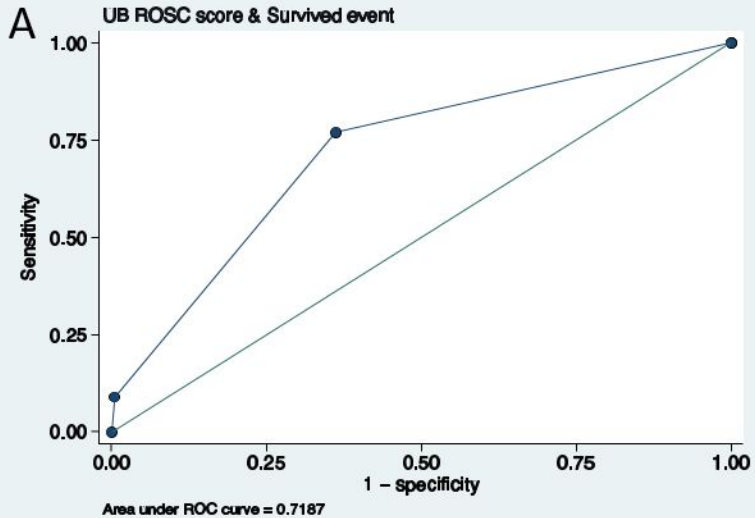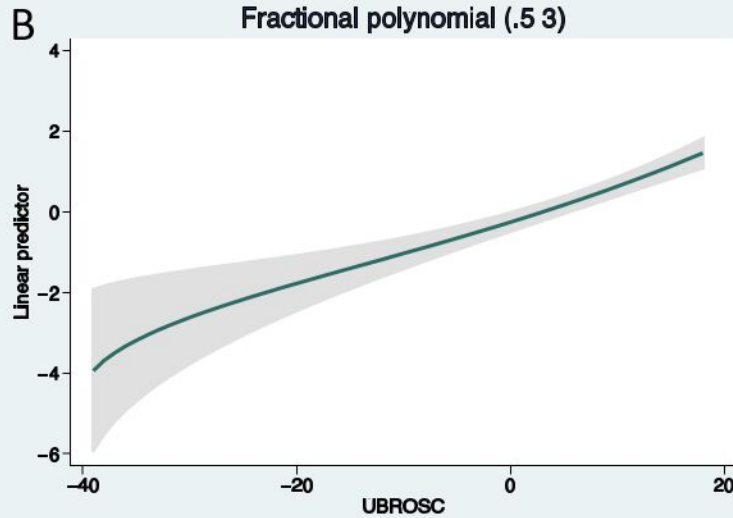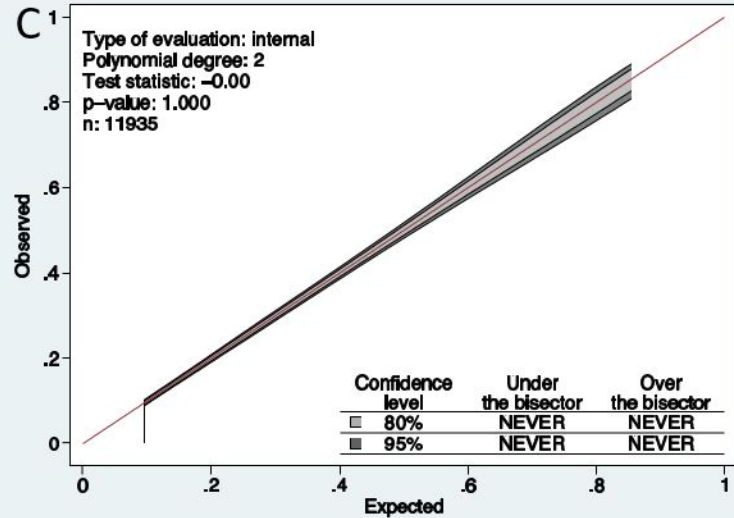

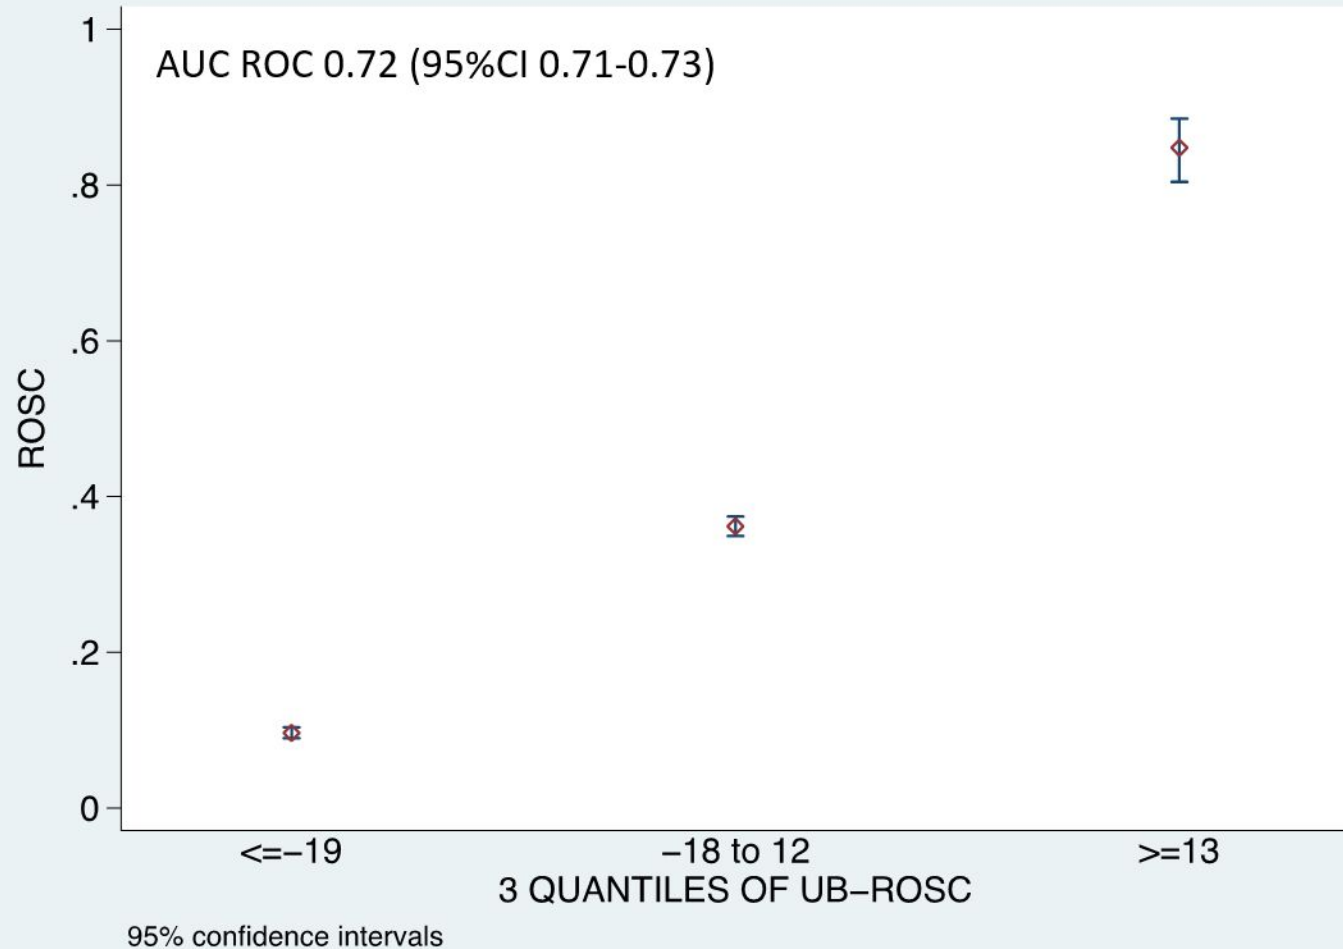

| UB-ROSC tertile | OR    | 95%CI     | P-value |
|-----------------|-------|-----------|---------|
| ≤-19            | 1     |           |         |
| -18 to 12       | 5.30  | 2.96-9.49 | <0.001  |
| ≥13             | 52.12 | 15.65-173 | <0.001  |
